# Supplementary material
Source: ML conference proceedings conference paper supplement (https://proceedings.mlr.press/v215/erreygers23a.html)
Supplement: Supplementary file 1 [file erreygers23a-supp.pdf]

**Proof of Theorem 3.** Let  $\mathbb{E}_{\mathcal{E}} := \{E \in \mathbb{E}_{\mathcal{D}} : \mathcal{E}^*(E) < +\infty\}$ . Since  $\mathcal{E}$  is downward continuous, we know from Lemma 2 that every linear expectation  $E \in \mathbb{E}_{\mathcal{E}}$  is downward continuous. Consequently, it follows from the Daniell–Stone Theorem that for all  $E \in \mathbb{E}_{\mathcal{E}}$ ,  $E = \hat{E}|_{\mathcal{D}}$  with

$$\hat{E} : \mathcal{M} \rightarrow \overline{\mathbb{R}} : g \mapsto \int g dP_E.$$

It follows immediately from this and Lemma 1 that  $\hat{E}$  is well defined and extends  $\mathcal{E}$ .

On several occasions, we will need that for all  $f \in \mathcal{M}(\mathcal{D})$  and  $E \in \mathbb{E}_{\mathcal{E}}$ ,  $\mathcal{E}^*(E) \in \mathbb{R}$  (due to Lemma 1) and

$$\hat{E}(f) \leq \hat{E}(f) + \mathcal{E}^*(E). \quad (12)$$

Next, we show that  $\hat{E}$  is a convex expectation. The extension  $\hat{E}$  is a nonlinear expectation: (i)  $\mathcal{M}(\mathcal{D})$  includes all constant real functions because  $\mathcal{D} \subseteq \mathcal{M}(\mathcal{D})$  and  $\mathcal{D}$  includes all constant real functions; (ii)  $\hat{E}$  is isotone because the Lebesgue integral is isotone on  $\mathcal{M}(\mathcal{D})$  [20, Chapter 8, Theorem 5 (iv)]; and (iii)  $\hat{E}$  is constant preserving because it extends  $\mathcal{E}$  and  $\mathcal{E}$  is constant preserving. To verify that  $\hat{E}$  is convex, we fix some  $f, g \in \mathcal{M}(\mathcal{D})$  and  $\lambda \in [0, 1]$  such that  $f + g$  is meaningful and in  $\mathcal{M}(\mathcal{D})$  and  $\lambda\hat{E}(f) + (1-\lambda)\hat{E}(g)$  is meaningful. If  $\lambda = 0$  or  $\lambda = 1$ , clearly  $\hat{E}(\lambda f + (1-\lambda)g) = \lambda\hat{E}(f) + (1-\lambda)\hat{E}(g)$ ; hence, without loss of generality we may assume that  $0 < \lambda < 1$ . Due to symmetry, and because  $\lambda\hat{E}(f) + (1-\lambda)\hat{E}(g)$  is meaningful, we need to distinguish three cases: (i)  $\hat{E}(f) = +\infty$  and  $\hat{E}(g) > -\infty$ ; (ii)  $\hat{E}(f)$  and  $\hat{E}(g)$  both real; and (iii)  $\hat{E}(f) = -\infty$  and  $\hat{E}(g) < +\infty$ . In the first case, the required inequality holds trivially. In the second case, it follows from Eqn. (12) that for all  $E \in \mathbb{E}_{\mathcal{E}}$ ,  $\hat{E}(f) < +\infty$  and  $\hat{E}(g) < +\infty$ , so  $\lambda\hat{E}(f) + (1-\lambda)\hat{E}(g)$  is meaningful and, due to the linearity of  $\hat{E}$  [20, Chapter 8, Theorem 5 (i)], equal to  $\hat{E}(\lambda f + (1-\lambda)g)$ . Similarly, in the third case, it follows from Eqn. (12) that for all  $E \in \mathbb{E}_{\mathcal{E}}$ ,  $\hat{E}(f) = -\infty$  and  $\hat{E}(g) < +\infty$ , so  $\lambda\hat{E}(f) + (1-\lambda)\hat{E}(g)$  is meaningful and, due to the linearity of  $\hat{E}$ , equal to  $\hat{E}(\lambda f + (1-\lambda)g)$ . Consequently, in the last two cases,

$$\begin{aligned} & \hat{E}(\lambda f + (1-\lambda)g) \\ &= \sup\{\hat{E}(\lambda f + (1-\lambda)g) - \mathcal{E}^*(E) : E \in \mathbb{E}_{\mathcal{E}}\} \\ &= \sup\{\hat{E}(\lambda f) + (1-\lambda)\hat{E}(g) - \mathcal{E}^*(E) : E \in \mathbb{E}_{\mathcal{E}}\} \\ &\leq \lambda \sup\{\hat{E}(f) - \mathcal{E}^*(E) : E \in \mathbb{E}_{\mathcal{E}}\} \\ &\quad + (1-\lambda) \sup\{\hat{E}(g) - \mathcal{E}^*(E) : E \in \mathbb{E}_{\mathcal{E}}\} \\ &= \lambda\hat{E}(f) + (1-\lambda)\hat{E}(g), \end{aligned}$$

as required.

Denk et al. [10, Theorem 3.10] show that the restriction of  $\hat{E}$  to  $\mathcal{M}(\mathcal{D}) \cap \mathcal{L}(\mathcal{Y}) \supseteq \mathcal{D}_{\delta, b}$  is downward continuous on  $\mathcal{D}_{\delta, b}$ , so clearly  $\hat{E}$  is downward continuous on  $\mathcal{D}_{\delta, b}$  too.

Proving the upward continuity on  $\mathcal{M}_b(\mathcal{D})$  is straightforward. Fix any  $(\mathcal{M}_b)^{\mathbb{N}} \ni (f_n)_{n \in \mathbb{N}} \nearrow f \in \mathcal{M}_b(\mathcal{D})$ . For

all  $E \in \mathbb{E}_{\mathcal{E}}$ ,  $\hat{E}$  is upward continuous on  $\mathcal{M}_b$ —due to the Monotone Convergence Theorem, see for example [35, Theorem 12.1]—and therefore  $\lim_{n \rightarrow +\infty} \hat{E}(f_n) = \sup_{n \in \mathbb{N}} \hat{E}(f_n) = \hat{E}(f)$ . From this and the isotonicity of  $\hat{E}$ , it follows that

$$\begin{aligned} \lim_{n \rightarrow +\infty} \hat{E}(f_n) &= \sup\{\hat{E}(f_n) : n \in \mathbb{N}\} \\ &= \sup\{\sup\{\hat{E}(f_n) - \mathcal{E}^*(E) : E \in \mathbb{E}_{\mathcal{E}}\} : n \in \mathbb{N}\} \\ &= \sup\{\sup\{\hat{E}(f_n) - \mathcal{E}^*(E) : n \in \mathbb{N}\} : E \in \mathbb{E}_{\mathcal{E}}\} \\ &= \sup\{\hat{E}(f) - \mathcal{E}^*(E) : E \in \mathbb{E}_{\mathcal{E}}\} \\ &= \hat{E}(f), \end{aligned}$$

as required.

To prove the second part of the statement, we assume that  $\mathcal{E}$  is an upper expectation. Recall from Lemma 1 that  $\mathcal{E}^*(E) = 0$  for all  $E \in \mathbb{E}_{\mathcal{E}}$  and that  $\mathbb{E}_{\mathcal{E}}$  is the set of dominated linear expectations (on  $\mathcal{D}$ ). Hence, to see that  $\hat{E}$  is positively homogeneous, it suffices to realise that for all  $E \in \mathbb{E}_{\mathcal{E}}$  (i)  $\mathcal{E}^*(E) = 0$  due to Lemma 1; and (ii)  $\hat{E}$  is homogeneous [20, Chapter 8, Theorem 5 (i)]. That  $\hat{E}$  is subadditive follows from a similar argument as the one we used to prove that  $\hat{E}$  is convex. ■

**Proof of Corollary 4.** From Theorem 3.10 in [10]—or the functional version of Choquet’s Capacitability Theorem, see [3, Proposition 2.1]—it follows that for all  $f \in \mathcal{M}_b(\mathcal{D}) \cap \mathcal{M}^b(\mathcal{D}) = \mathcal{M}(\mathcal{D}) \cap \mathcal{L}(\mathcal{Y})$ ,

$$\hat{E}(f) = \sup\left\{\lim_{n \rightarrow +\infty} \hat{E}(f_n) : \mathcal{D}^{\mathbb{N}} \ni (f_n)_{n \in \mathbb{N}} \searrow_{\leq} f\right\}. \quad (13)$$

It remains for us to prove the equality in the statement for all  $f \in \mathcal{M}_b(\mathcal{D}) \setminus \mathcal{M}^b(\mathcal{D})$ , so let us fix any such  $f$ . Then  $(f \wedge k)_{k \in \mathbb{N}}$  is an increasing sequence in  $\mathcal{M}_b(\mathcal{D}) \cap \mathcal{M}^b(\mathcal{D})$  that converges pointwise to  $f$ , and therefore

$$\hat{E}(f) = \lim_{k \rightarrow +\infty} \hat{E}(f \wedge k) = \sup\{\hat{E}(f \wedge k) : k \in \mathbb{N}\}.$$

Because  $f \wedge k \in \mathcal{M}_b(\mathcal{D}) \cap \mathcal{M}^b(\mathcal{D})$  for all  $k \in \mathbb{N}$ , it follows from this equality and Eqn. (13) that

$$\begin{aligned} \hat{E}(f) &= \sup\left\{\lim_{n \rightarrow +\infty} \hat{E}(f_n) : k \in \mathbb{N}, \mathcal{D}^{\mathbb{N}} \ni (f_n)_{n \in \mathbb{N}} \searrow_{\leq} f \wedge k\right\} \\ &= \sup\left\{\lim_{n \rightarrow +\infty} \hat{E}(f_n) : \mathcal{D}^{\mathbb{N}} \ni (f_n)_{n \in \mathbb{N}} \searrow_{\leq} f\right\}, \end{aligned}$$

as required. ■

**Proof of Equation (2).** Due to Lemma 8.1 (and Lemma 8.3) in [35],  $\sigma(\mathcal{D})$  is generated by the collection of level sets

$$\mathcal{C} := \{\{\omega \in \Omega : f(\omega) \geq \alpha\} : f \in \mathcal{D}, \alpha \in \mathbb{R}\}.$$

Hence, it follows from Eqn. (1) that every cylinder  $F \in \mathcal{F}$  belongs to  $\mathcal{C}$ , and therefore also to  $\sigma(\mathcal{D})$ . Consequently,  $\sigma(\mathcal{F}) \subseteq \sigma(\mathcal{D})$ .

To prove that  $\sigma(\mathcal{D}) \subseteq \sigma(\mathcal{F})$ , it suffices to verify that any level set in  $\mathcal{C}$  is a cylinder. To this end, we fix any  $f \in \mathcal{D}$  and  $\alpha \in \mathbb{R}$ . By definition of  $\mathcal{D}$ , there are some  $U \in \mathcal{U}$  and  $g \in \mathcal{L}(\mathcal{X}^U)$  such that  $f = g \circ \pi_U$ . Let  $A := \{x \in \mathcal{X}^U : g(x) \geq \alpha\}$ . Then clearly

$$\{\omega \in \Omega : f(\omega) \geq \alpha\} = \{\omega \in \Omega : \pi_U(\omega) \in A\},$$

so this level set is indeed a cylinder.  $\blacksquare$

**Proof of Lemma 9.** That  $R_E$  is finitely additive with  $R_E(\Omega) = 1$  follows immediately because  $E$  is a linear expectation. Hence, we focus on the second part of the statement.

First, we assume that  $E$  is downward continuous. Then it follows immediately from the Daniell–Stone Theorem that  $R_E = P_E|_{\mathcal{F}}$ , and therefore  $R_E$  is countably additive.

Second, we assume that  $R_E$  is countably additive. Then it is well known, see for example Proposition 9 in [20, Chapter 7] or Lemma 4.3 in [33, Chapter II], that for any decreasing  $(F_n)_{n \in \mathbb{N}} \in \mathcal{F}^{\mathbb{N}}$ —meaning that  $F_n \supseteq F_{n+1}$  for all  $n \in \mathbb{N}$ —with  $\bigcap_{n \in \mathbb{N}} F_n = \emptyset$ ,

$$\lim_{n \rightarrow +\infty} R_E(F_n) = 0. \quad (14)$$

To show that  $E$  is downward continuous, we fix any  $f \in \mathcal{D}$  and any decreasing sequence  $(f_n)_{n \in \mathbb{N}} \in \mathcal{D}^{\mathbb{N}}$  that converges pointwise to  $f$ . Then

$$E(f_n) - E(f) = E(f_n - f) \geq 0 \quad \text{for all } n \in \mathbb{N}. \quad (15)$$

Obviously,  $(f_n - f)_{n \in \mathbb{N}}$  is a decreasing sequence in  $\mathcal{D}$  that converges pointwise to 0.

Fix any  $\epsilon \in \mathbb{R}_{>0}$ , and let  $\beta := \|f_1 - f\| = \sup f_1 - f$ . Then for all  $n \in \mathbb{N}$ , we let  $F_n := \{\omega \in \Omega : f_n(\omega) - f(\omega) > \epsilon\}$ ; it is a bit laborious to verify that  $F_n \in \mathcal{F}$ , so we leave this as an exercise to the reader. This way,  $(F_n)_{n \in \mathbb{N}}$  is a decreasing sequence in  $\mathcal{F}$  with  $\bigcap_{n \in \mathbb{N}} F_n = \emptyset$ , and for all  $n \in \mathbb{N}$ ,  $f_n - f \leq \epsilon + \beta \mathbb{1}_{F_n}$  and therefore

$$E(f_n - f) \leq \epsilon + E(\mathbb{1}_{F_n}) = \epsilon + R_E(F_n).$$

It follows from this and Eqn. (14) that

$$\lim_{n \rightarrow +\infty} E(f_n - f) \leq \lim_{n \rightarrow +\infty} \epsilon + \beta R_E(F_n) = \epsilon.$$

Since this inequality holds for any strictly positive real number  $\epsilon$ , we infer from it and the one in Eqn. (15) that

$$\lim_{n \rightarrow +\infty} E(f_n) = E(f),$$

as required.  $\blacksquare$

**Proof of Theorem 7.** To prove that  $\bar{E}$  is downward continuous, we recall from Proposition 6 that  $\bar{E}$  is an upper

expectation. By Lemmas 1 and 2, it suffices to verify that every dominated linear expectation  $E$  in

$$\mathbb{E}_{\bar{E}} := \{E \in \mathbb{E}_{\mathcal{D}} : (\forall f \in \mathcal{D}) E(f) \leq \bar{E}(f)\}$$

is downward continuous. So fix any  $E \in \mathbb{E}_{\bar{E}}$ , and let

$$R_E : \mathcal{F} \rightarrow [0, 1] : F \mapsto E(\mathbb{1}_F).$$

We know from Lemma 9 that  $R_E$  is finitely additive with  $R_E(\Omega) = 1$ , and that  $E$  is downward continuous if and only if  $R_E$  is countably additive. Hence, it suffices to show that  $R_E$  is countably additive, and we will do so by checking that the conditions in Lemma 8 are satisfied.

First, fix any  $U \in \mathcal{U}$ , and let

$$R_E^U : \wp(\mathcal{X}^U) \rightarrow [0, 1] : A \mapsto R_E(\pi_U^{-1}(A)) = E(\mathbb{1}_{\pi_U^{-1}(A)}).$$

Clearly,  $R_E^U$  is a non-negative set function with  $R_E^U(\mathcal{X}^U) = R_E(\Omega) = 1$  that is finitely additive. By a standard result in measure theory—see for example Proposition 9 in [20, Chapter 7] or Lemma 4.3 in [33, Chapter II]— $R_E^U$  is countably additive, and therefore a probability measure, if and only if for any decreasing sequence  $(A_k)_{k \in \mathbb{N}}$  in  $\mathcal{X}^U$  with  $\bigcap_{k \in \mathbb{N}} A_k = \emptyset$ ,  $\lim_{k \rightarrow +\infty} R_E^U(A_k) = 0$ . For any such sequence  $(A_k)_{k \in \mathbb{N}}$ , the corresponding sequence of indicators  $(\mathbb{1}_{\pi_U^{-1}(A_k)})_{k \in \mathbb{N}} \in \mathcal{D}^{\mathbb{N}}$  clearly decreases to 0, and therefore

$$\begin{aligned} 0 &\leq \lim_{k \rightarrow +\infty} R_E^U(A_k) \leq \lim_{k \rightarrow +\infty} \bar{E}(\mathbb{1}_{\pi_U^{-1}(A_k)}) \\ &= \lim_{k \rightarrow +\infty} \bar{E}_U(\mathbb{1}_{A_k}) = 0, \end{aligned}$$

where for the final equality we used that  $\bar{E}_U$  is downward continuous and constant preserving.

Next, fix some  $n \in \mathbb{N}$  and  $t \in [0, n]$ . Then for all  $s \in \mathbb{R}_{\geq 0} \setminus \{t\}$ ,

$$R_E^{\{t,s\}}(D_{\{t,s\}}^\#) \leq \bar{E}_{\{t,s\}}(d_{\{t,s\}}^\#).$$

Hence,

$$\limsup_{s \rightarrow t} \frac{R_E^{\{t,s\}}(D_{\{t,s\}}^\#)}{|s-t|} \leq \limsup_{s \rightarrow t} \frac{\bar{E}_{\{t,s\}}(d_{\{t,s\}}^\#)}{|s-t|} \leq \lambda_n,$$

as required.  $\blacksquare$

**Proof of Proposition 13.** We have already established that  $(\bar{M}_t)_{t \in \mathbb{R}_{\geq 0}}$  is a semigroup of upper transition operators, so it remains for us to verify (i) that  $\bar{M}_t$  is downward continuous for all  $t \in \mathbb{R}_{>0}$ , and (ii) that  $(\bar{M}_t)_{t \in \mathbb{R}_{\geq 0}}$  has uniformly bounded rate.

To verify that  $\bar{M}_t$  is downward continuous for all  $t \in \mathbb{R}_{>0}$ , we fix some  $t \in \mathbb{R}_{>0}$  and  $z \in \mathbb{Z}_{\geq 0}$ , and consider any  $\mathcal{L}^{\mathbb{N}} \ni (f_n)_{n \in \mathbb{N}} \searrow f \in \mathcal{L}$ . On the one

hand, since  $\bar{M}_t$  is isotone,  $([\bar{M}_t f_n](z))_{n \in \mathbb{N}}$  decreases, with  $\lim_{n \rightarrow +\infty} [\bar{M}_t f_n](z) \geq [\bar{M}_t f](z)$ . On the other hand, for all  $n \in \mathbb{N}$ , it follows from the subadditivity of  $\bar{M}_t$  that

$$[\bar{M}_t f_n](z) \leq [\bar{M}_t(f_n - f)](z) + [\bar{M}_t f](z).$$

Hence, it suffices for us to show that

$$\lim_{n \rightarrow +\infty} [\bar{M}_t(f_n - f)](z) \leq 0. \quad (16)$$

For all  $n \in \mathbb{N}$ , let

$$\tilde{f}_n: \mathbb{Z}_{\geq 0} \rightarrow \mathbb{R}: x \mapsto \max\{f_n(y) - f(y) : y \in \mathbb{Z}_{\geq 0}, y \leq x\}.$$

It is easy to verify that for all  $n \in \mathbb{N}$ ,  $\tilde{f}_n$  is a bounded function that dominates  $f_n - f$ , so it follows from the isotonicity of  $\bar{M}_t$  that

$$[\bar{M}_t(f_n - f)](z) \leq [\bar{M}_t \tilde{f}_n](z).$$

Moreover, since  $\tilde{f}_n$  is increasing (in the sense that  $\tilde{f}_n(z) \leq \tilde{f}_n(y)$  whenever  $z \leq y$ ), it follows from Theorem 15, Proposition 16 and Eqn. (18) in [15] that

$$[\bar{M}_t(f_n - f)](z) \leq \sum_{y=z}^{+\infty} \tilde{f}_n(y) \psi_{\bar{\lambda}t}(\{y-z\}) = \int \tilde{f}_n(z+\bullet) d\psi_{\bar{\lambda}t},$$

where  $\psi_{\bar{\lambda}t}: \wp(\mathbb{Z}_{\geq 0}) \rightarrow [0, 1]$  is the probability measure corresponding to the Poisson distribution with parameter  $\bar{\lambda}t$ . Finally, it is easy to verify that  $(\tilde{f}_n)_{n \in \mathbb{N}}$  is monotone and decreases pointwise to 0, so a straightforward application of the Monotone Convergence Theorem yields

$$\lim_{n \rightarrow +\infty} \int \tilde{f}_n(z+\bullet) d\psi_{\bar{\lambda}t} = 0.$$

Eqn. (16) follows from this equality and the previous inequality, and this finalises our proof for the downward continuity.

Finally, we verify that the sublinear Markov semigroup  $(\bar{M}_t)_{t \in \mathbb{R}_{\geq 0}}$  has uniformly bounded rate—so satisfies Eqn. (4). First, note that due to constant additivity,

$$\begin{aligned} & \limsup_{t \searrow 0} \frac{1}{t} \sup \left\{ [\bar{M}_t(1 - \mathbb{1}_x)](x) : x \in \mathcal{X} \right\} \\ &= \limsup_{t \searrow 0} \sup \left\{ \frac{[\bar{M}_t(-\mathbb{1}_x)](x) - (-\mathbb{1}_x(x))}{t} : x \in \mathcal{X} \right\}. \end{aligned}$$

It follows from this, the definition of the norms  $\|\bullet\|$  and  $\|\bullet\|_{\text{op}}^0$  and Eqn. (11) that

$$\begin{aligned} & \limsup_{t \searrow 0} \frac{1}{t} \sup \left\{ [\bar{M}_t(1 - \mathbb{1}_x)](x) : x \in \mathcal{X} \right\} \\ & \leq \limsup_{t \searrow 0} \left\| \left\| \frac{\bar{M}(-\mathbb{1}_x) - \mathbb{I}(-\mathbb{1}_x)}{t} \right\| : x \in \mathcal{X} \right\} \end{aligned}$$

$$\leq \lim_{t \searrow 0} \left\| \frac{\bar{M}_t - \mathbb{I}}{t} \right\|_{\text{op}}^0 = \|\bar{L}\|_{\text{op}}^0 < +\infty,$$

where the strict inequality holds because  $\bar{L}$  is a bounded operator.  $\blacksquare$
